# Supplementary material for: Comprehensive transcriptome analysis reveals heat-responsive genes in flowering Chinese cabbage (Brassica campestris L. ssp. chinensis) using RNA sequencing
Source: Frontiers journal article supplement (doi:10.3389/fpls.2022.1077920), 2022-12-02
Supplement: Presentation_1.pdf [file Presentation_1.pdf]

## Supplementary

### **Comprehensive transcriptome analysis reveals heat-responsive genes in flowering Chinese cabbage (*Brassica campestris* L. ssp. *chinensis*) using RNA sequencing**

Muhammad Ikram<sup>1, †</sup>, Jingfang Chen<sup>1, †</sup>, Yanshi Xia<sup>1, \*</sup>, Ronghua Li<sup>1</sup>, Kadambot H.M. Siddique<sup>2</sup>, Peiguo Guo<sup>1, \*</sup>

<sup>1</sup> Guangdong Provincial Key Laboratory of Plant Adaptation and Molecular Design, International Crop Research Center for Stress Resistance, School of Life Sciences, Guangzhou University, Guangzhou 510006, China

<sup>2</sup> The UWA Institute of Agriculture, UWA School of Agriculture & Environment, The University of Western Australia, Perth, WA 6001, Australia

\* Corresponding author: [guopg@gzhu.edu.cn](mailto:guopg@gzhu.edu.cn);

[xiayanshi922@163.com](mailto:xiayanshi922@163.com)

<sup>†</sup> Authors contributed equally to this work

Figures S1-S5

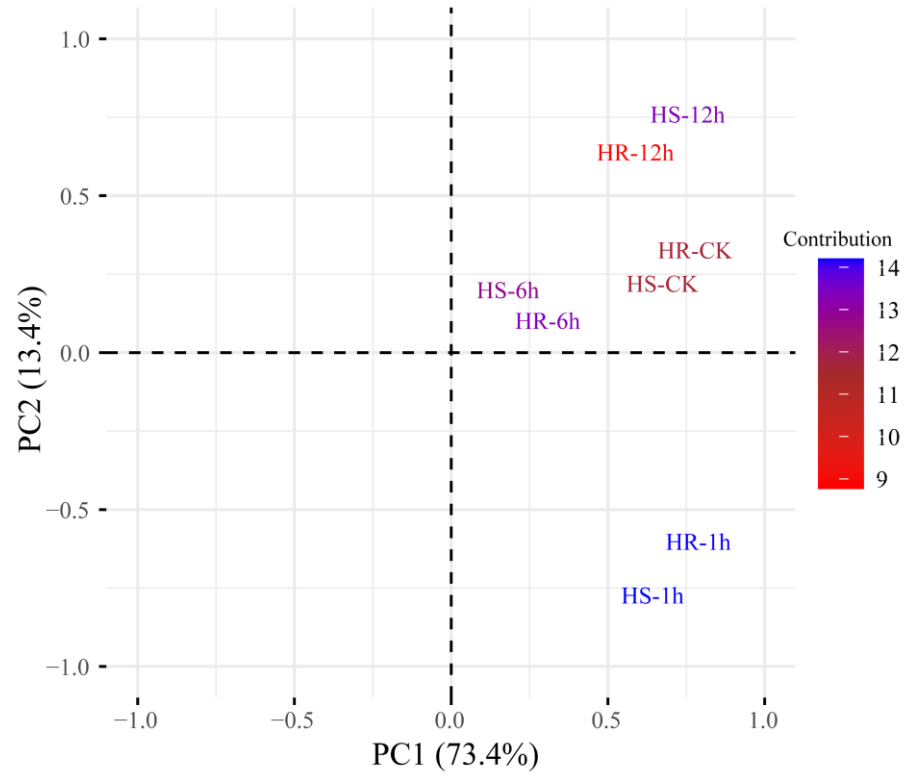

**Figure S1. Principal component analysis using FPKM values of heat-sensitive and heat-tolerant flowering Chinese cabbage varieties.**

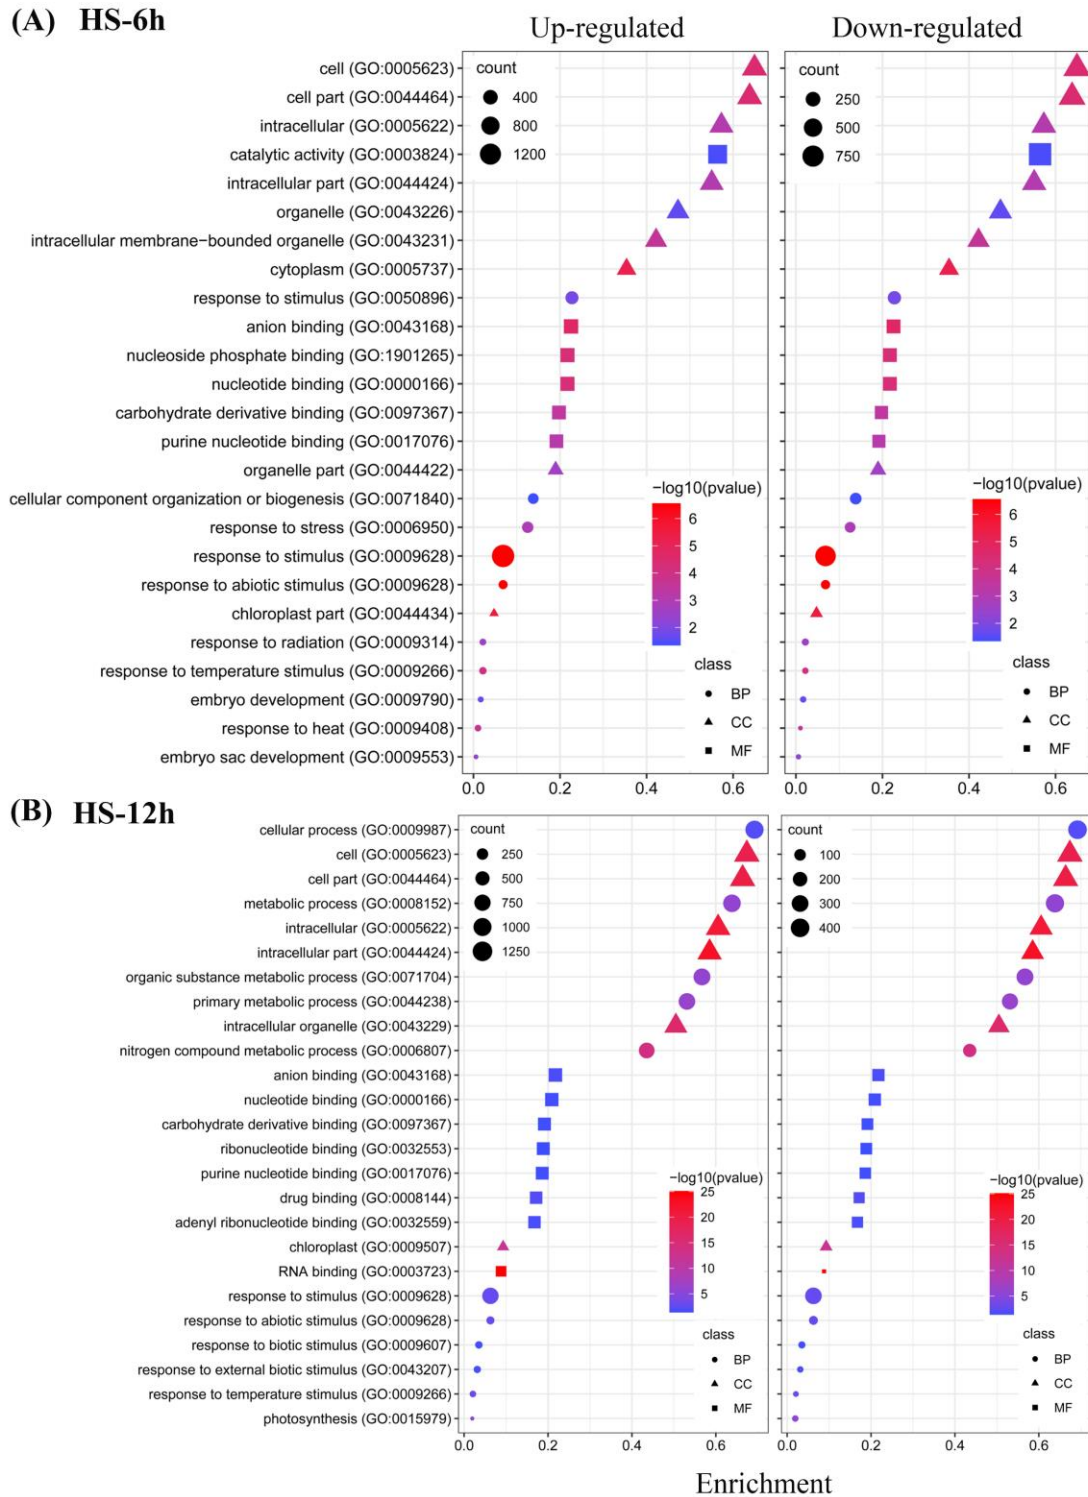

**Figure S2. GO enrichment analysis of up- and down-regulated genes in heat-sensitive (3T-6) flowering Chinese cabbage.** The top 25 GO terms in three categories are listed as (A) HS-CK vs. HS-6h and (B) HS-CK vs. HS-12h at  $P \leq 0.05$ .

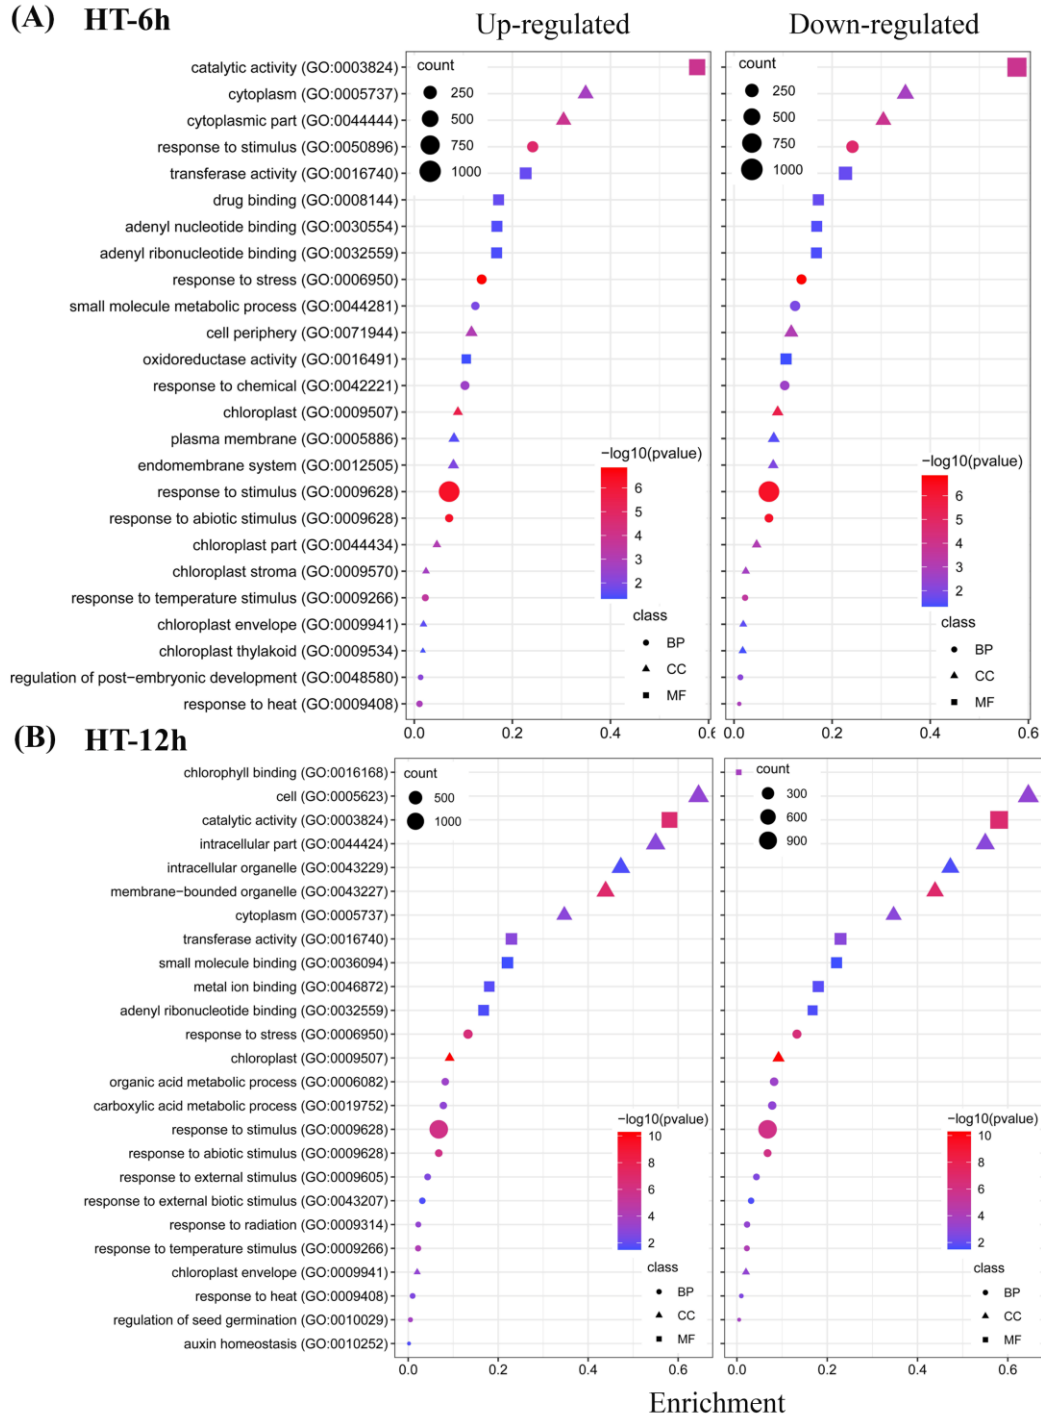

**Figure S3. GO enrichment analysis of up- and down-regulated genes of heat-tolerant (Youlu-501) flowering Chinese cabbage.** The top 25 GO terms in three categories are listed as (A) HT-CK vs. HT-6h and (B) HT-CK vs. HT-12h at  $P \leq 0.05$ .

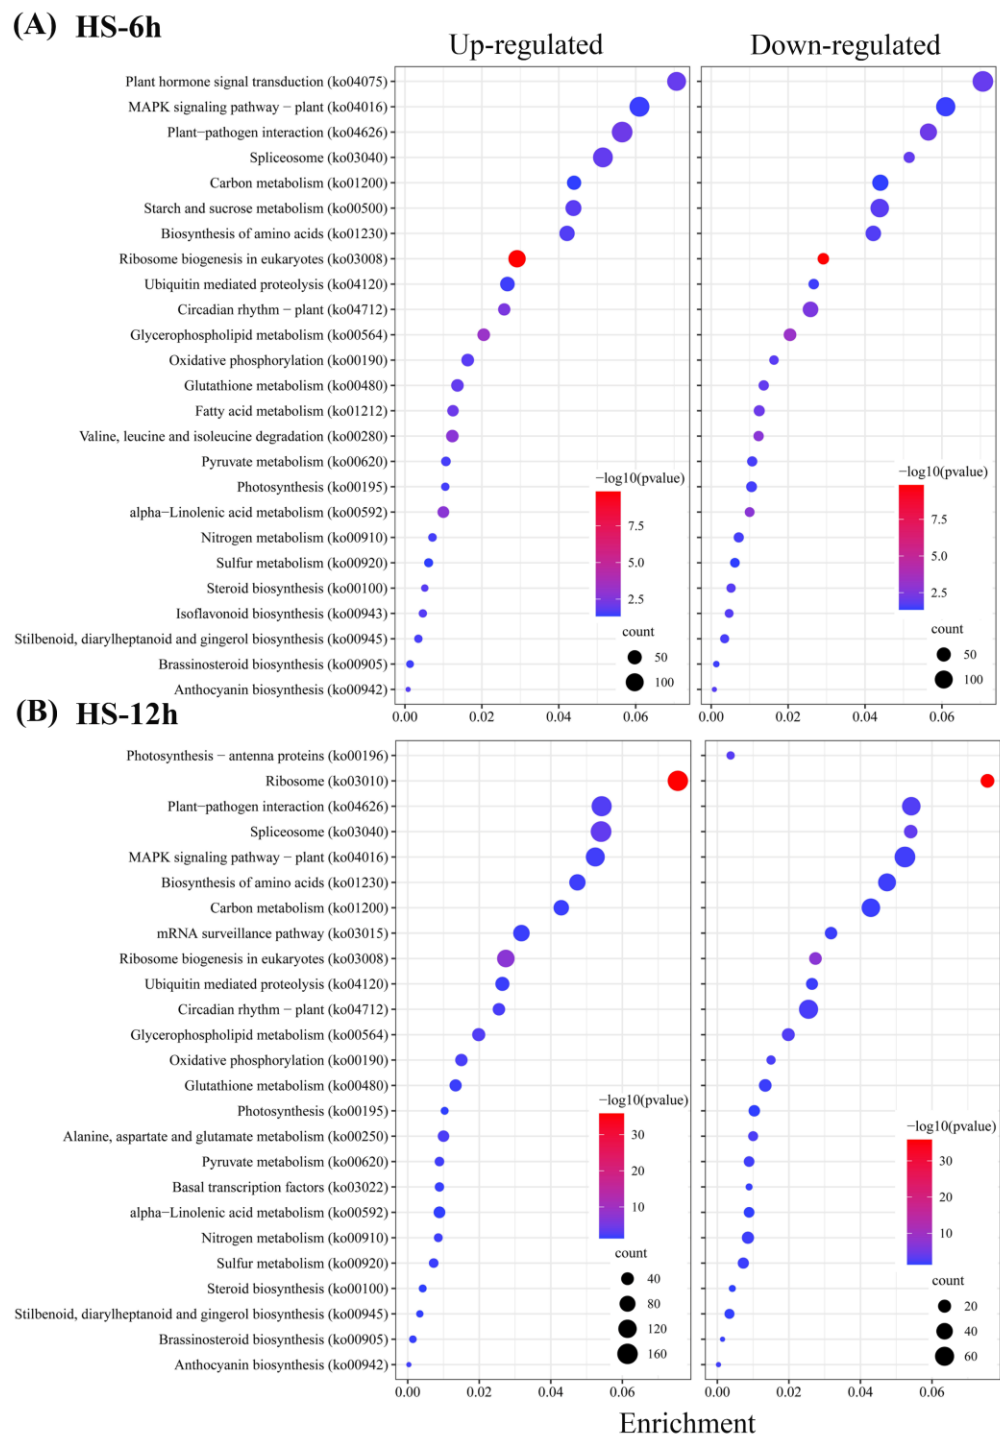

**Figure S4. KEGG enrichment analysis of up- and down-regulated genes of heat-sensitive (3T-6) flowering Chinese cabbage.** The top 25 pathways are listed as (A) HS-CK vs. HS-6h and (B) HS-CK vs. HS-12h at  $P \leq 0.05$ .

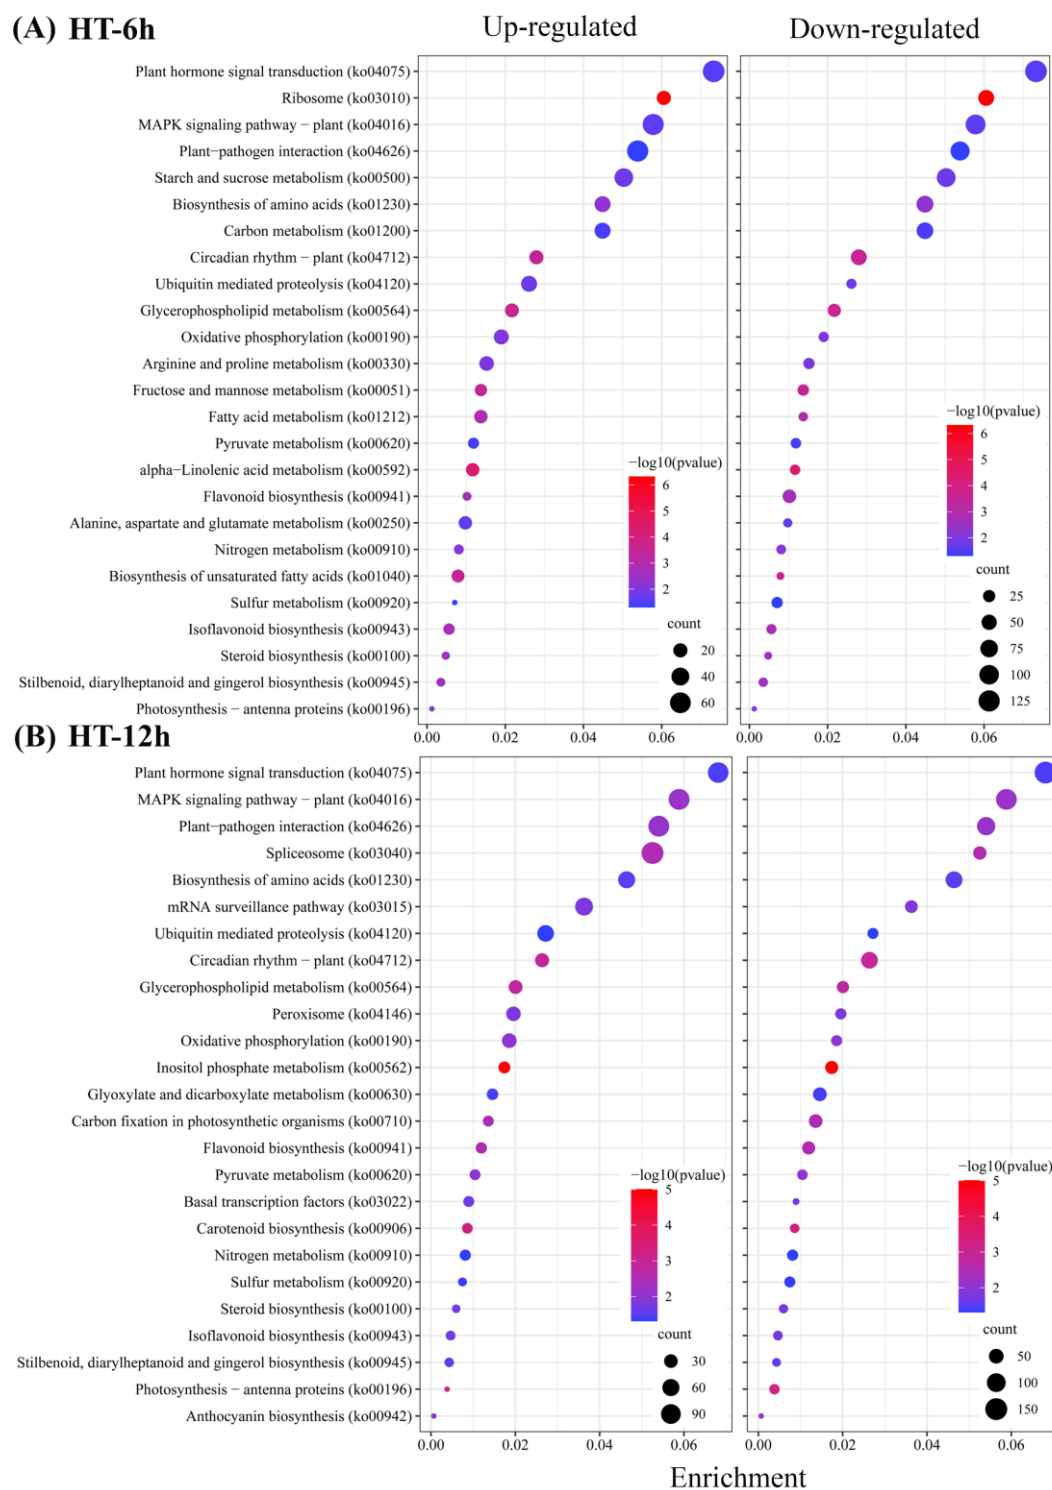

**Figure S5. KEGG enrichment analysis of up- and down-regulated genes of heat-tolerant (Youlu-501) flowering Chinese cabbage.** The top 25 pathways are listed as (A) HT-CK vs. HT-6h and (B) HT-CK vs. HT-12h at  $P \leq 0.05$ .
